# Supplementary material for: Microalgae Encapsulation Systems for Food, Pharmaceutical and Cosmetics Applications
Source: PubMed Central journal article supplement (PMC7765346; doi:10.3390/md18120644), 2020-12-15
Supplement: marinedrugs-18-00644-s001.pdf [file marinedrugs-18-00644-s001.pdf]

# Supplementary Material: Microalgae encapsulation systems for food, pharmaceutical and cosmetics applications

Marta V. Vieira, Lorenzo M. Pastrana and Pablo Fuciños

**Table S1.** Different coating materials used for encapsulation systems and their CAS number.

| <b>Classification</b>                 | <b>Type of material</b>   | <b>Compound</b>         | <b>CAS number</b>                     |
|---------------------------------------|---------------------------|-------------------------|---------------------------------------|
| <b>Natural resources</b>              | Carbohydrates             | Alginate                | 9005-38-3                             |
|                                       |                           | Maltodextrin            | 9050-36-6                             |
|                                       |                           | Pectin                  | 9000-69-5                             |
|                                       |                           | Cellulose               | 9004-34-6                             |
|                                       |                           | Inulin                  | 9005-80-5                             |
|                                       |                           | Chitosan                | 9012-76-4                             |
|                                       | Proteins                  | Gelatin                 | 9000-70-8                             |
|                                       |                           | Whey protein            | 91082-88-1                            |
|                                       |                           | Casein                  | 9000-71-9                             |
|                                       |                           | Bovine Serum Albumin    | 9048-46-8                             |
|                                       | Gums                      | Arabic                  | 9000-01-5                             |
|                                       |                           | Guar                    | 9000-30-0                             |
|                                       | <b>Synthetic polymers</b> | Biodegradable           | Poly ( $\epsilon$ -caprolactone)(PCL) |
| Poly (lactic acid) (PLA)              |                           |                         | 26100-51-6                            |
| Poly (lactic-co-glycolic acid) (PLGA) |                           |                         | 26780-50-7                            |
| Non-biodegradable                     |                           | Carboxymethyl cellulose | 9004-32-4                             |
|                                       |                           | Cellulose acetate       | 9004-35-7                             |
|                                       |                           | Polyvinyl alcohol (PVA) | 9002-89-5                             |
